# Supplementary material
Source: Springer Nature journal article supplement (https://www.springermedizin.de/resource/supplementary/12916_2011_552_MOESM10_ESM.pdf/9598126)
Supplement: MOESM10 [file 9598126]

$$\text{Pt1Mark}_{ij} \sim N(XB, \Omega)$$

$$\text{Pt1Mark}_{ij} = \beta_{0ij} \text{Constant} + \beta_{1j} \text{Pt1Attempt0}_{ij}$$

$$\beta_{0ij} = -4.395(0.060) + \mu_{0j} + e_{0ij}$$

$$\beta_{1j} = 3.253(0.028) + \mu_{1j}$$

Overall slope (mean)

Variance of intercept

$$\begin{bmatrix} \mu_{0j} \\ \mu_{1j} \end{bmatrix} \sim N(0, \Omega_u) : \Omega_u = \begin{bmatrix} 120.635(1.019) & -0.177(0.331) \\ -0.177(0.331) & 3.259(0.112) \end{bmatrix}$$

Covariance of intercept and slope

Variance of slope

$$\begin{bmatrix} e_{0ij} \end{bmatrix} \sim N(0, \Omega_e) : \Omega_e = \begin{bmatrix} 19.925(0.183) \end{bmatrix}$$
